# Supplementary material for: Surface plasmon nanolithography: impact of dynamically varying near-field boundary conditions at the air–polymer interface
Source: Royal Society of Chemistry journal article supplement (doi:10.1039/c2jm15864g), 2012-01-01
Supplement: c2jm15864g.pdf [file c2jm15864g.pdf]

## Supporting Information

# Surface plasmon nanolithography: impact of dynamically varying near-field boundary conditions at the air–polymer interface

Tobias König, Y. Nataraja Sekhar and Svetlana Santer\*

Department of Experimental Physics, Institute for Physics and Astronomy, University of Potsdam, Karl-Liebknecht Str. 24/25, 14476 Potsdam, Germany. E-mail: [santer@uni-potsdam.de](mailto:santer@uni-potsdam.de)

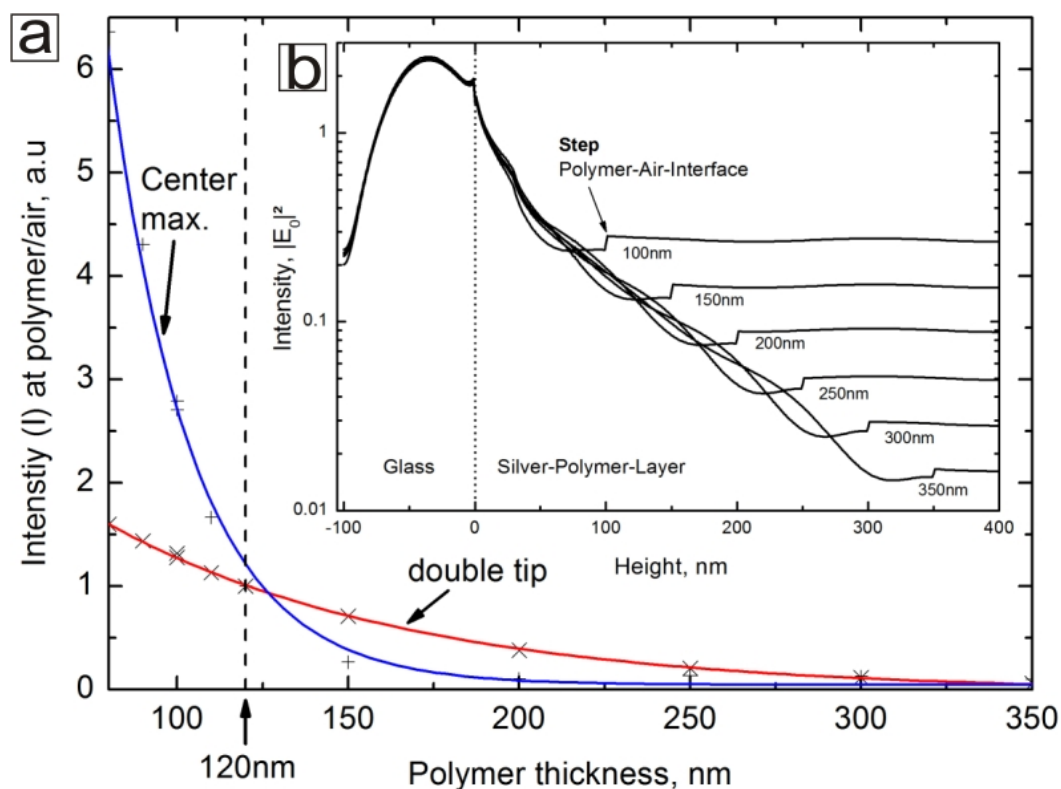

**Fig. S1** The near field intensity at the azo-air interface at the middle (blue curve) and on the sides (red curve) of the metal nano rod decreases exponentially with increasing average film thickness. At polymer film thicknesses larger than 120nm, double-tip imprints (red curve) dominate. (b) The intensity distribution averaged over the whole area above the nano rod as a function of the distance to the glass surface for different thicknesses of the polymer.
