# Supplementary figures and images for: Surface plasmon nanolithography: impact of dynamically varying near-field boundary conditions at the air–polymer interface
Source: Royal Society of Chemistry journal article supplement (doi:10.1039/c2jm15864g), 2012-01-01

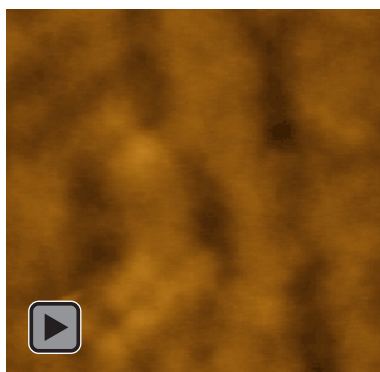

Supplement: c2jm15864g_2.pdf [file c2jm15864g_2.pdf]
